# Supplementary material for: Late‐life exercise mitigates skeletal muscle epigenetic aging
Source: PubMed Central journal article supplement (PMC8761012; doi:10.1111/acel.13527), 2021-12-21

**Figure S1***Rbm10***A**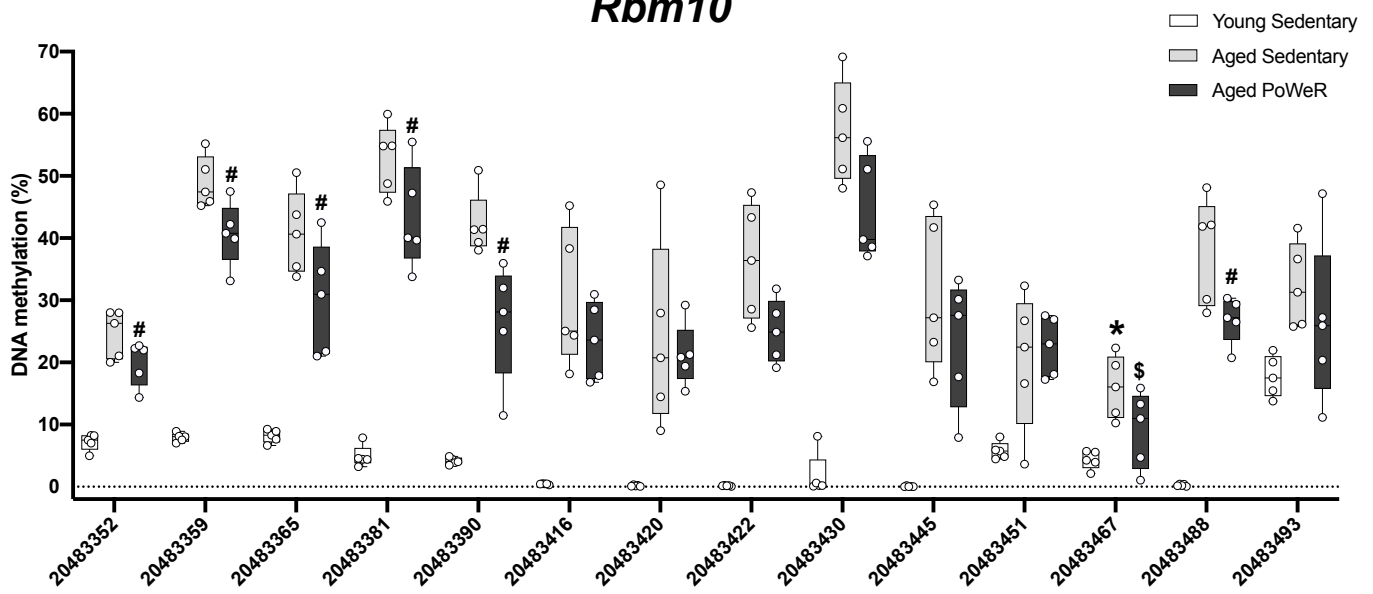*Timm8a1***B**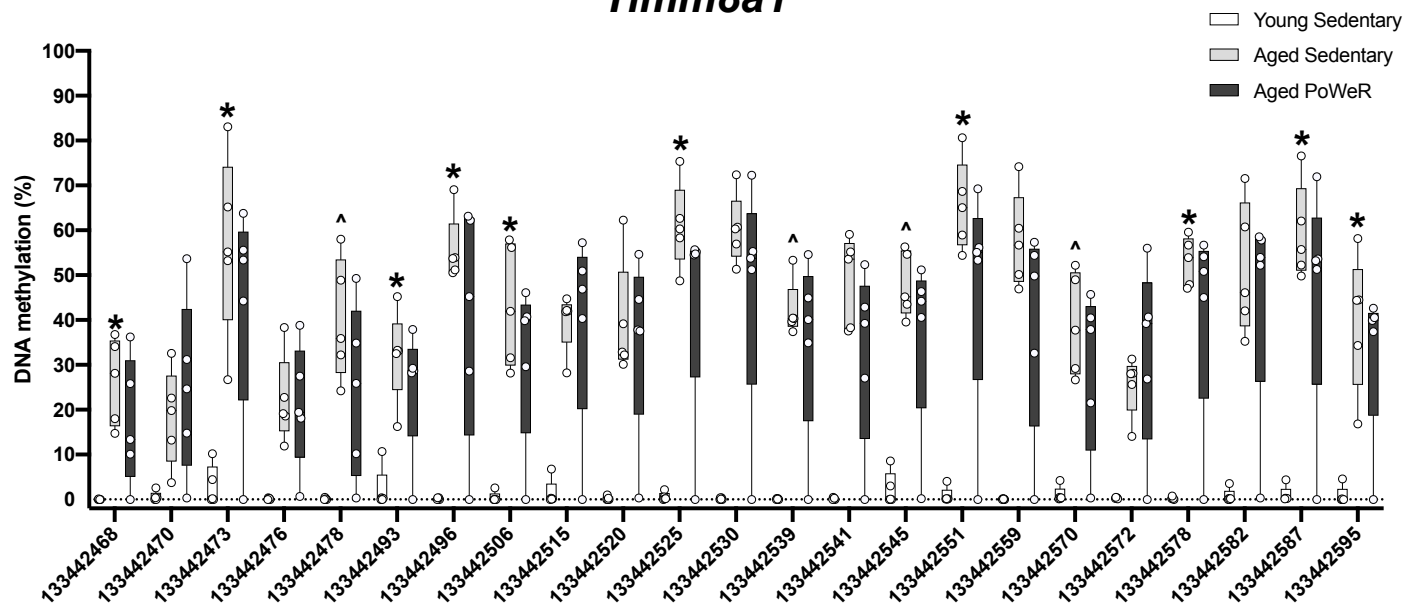

rDNA Enhancer

**C**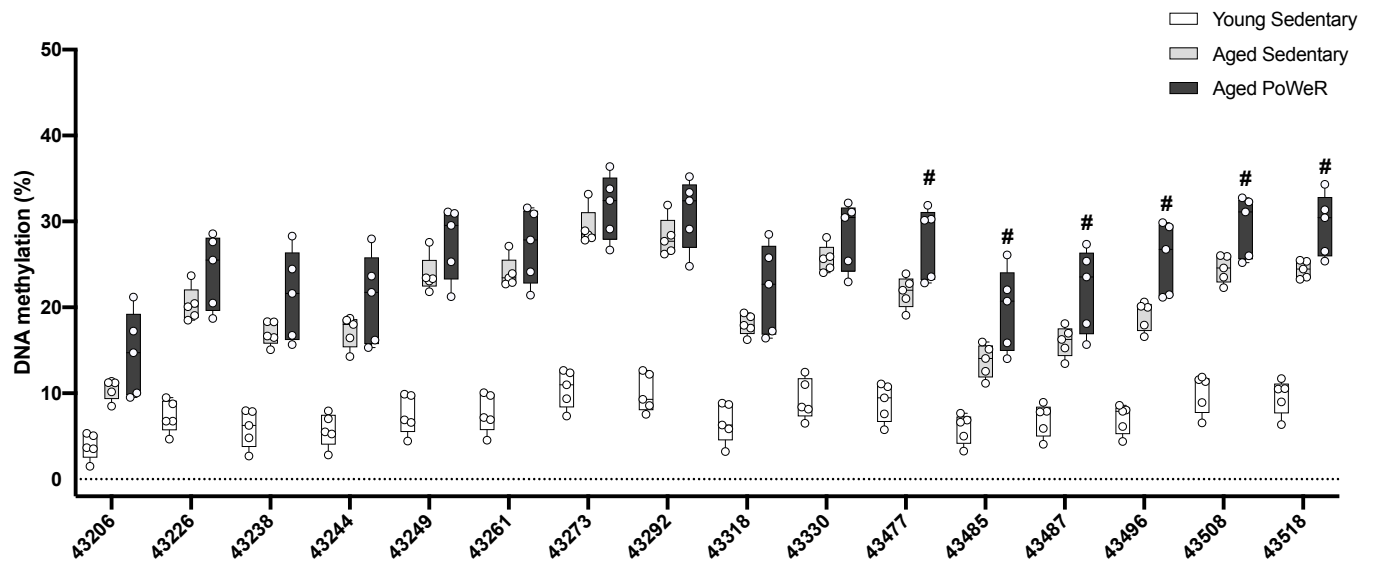

Supplement: ACEL-21-e13527-s012.pdf [file ACEL-21-e13527-s012.pdf]
