# Supplementary material for: Late‐life exercise mitigates skeletal muscle epigenetic aging
Source: PubMed Central journal article supplement (PMC8761012; doi:10.1111/acel.13527), 2021-12-21

**Figure S3**

**A**

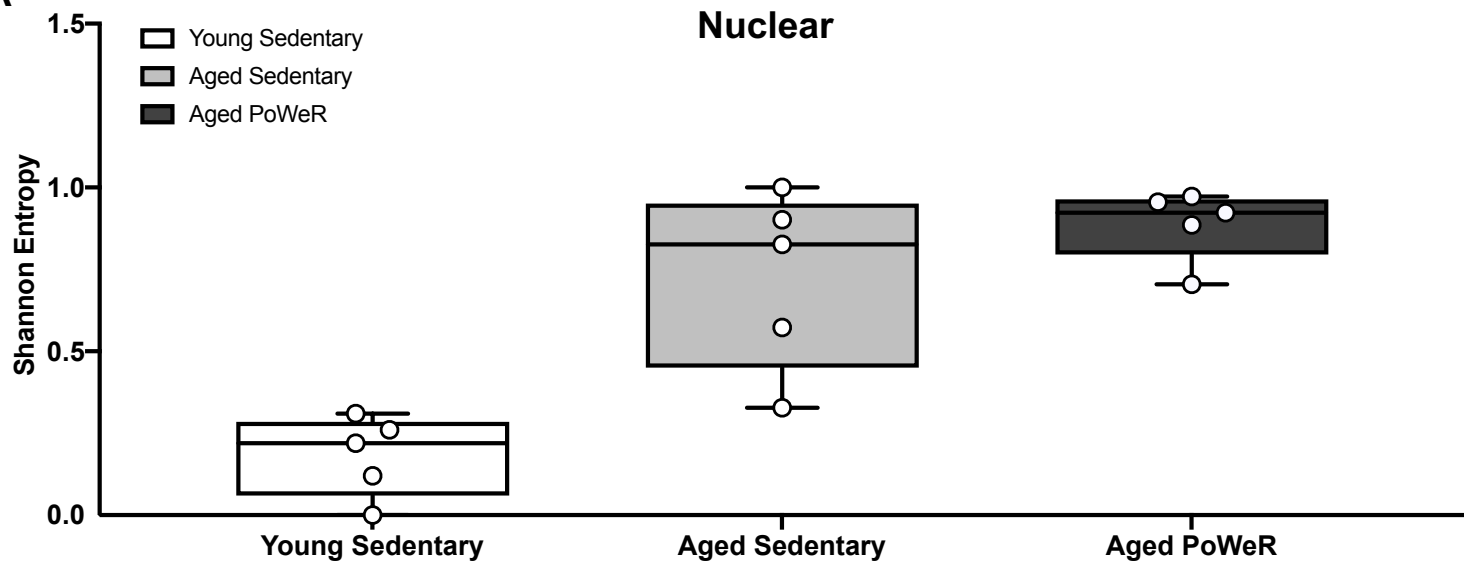

**B**

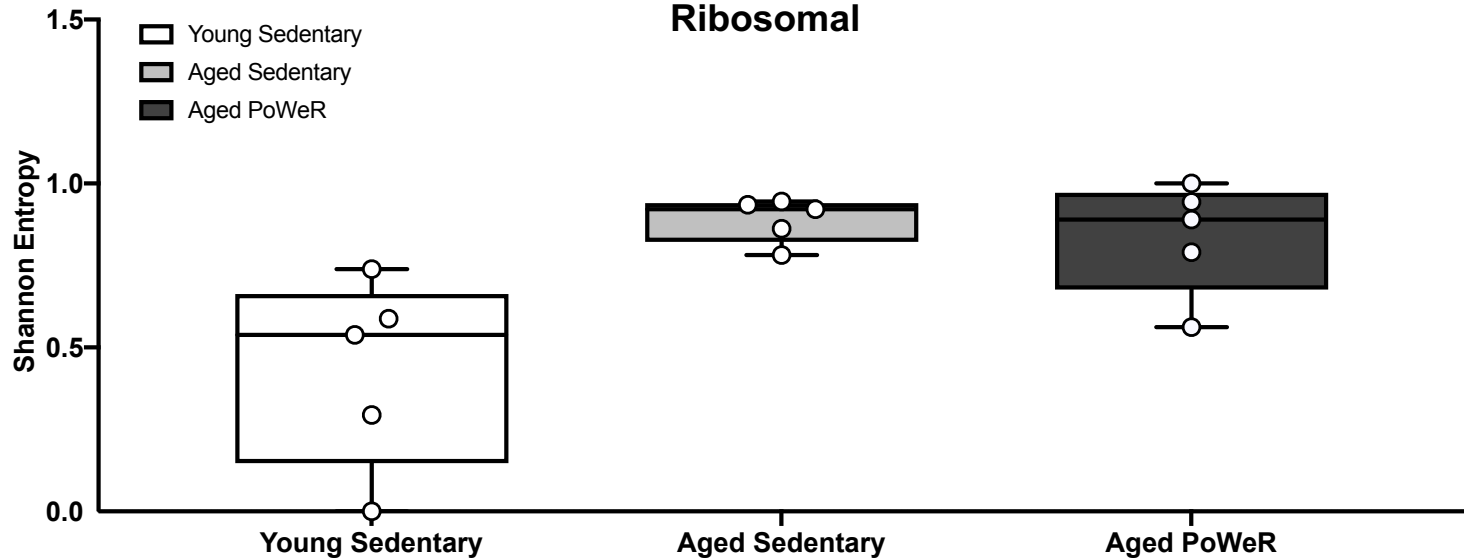

**C**

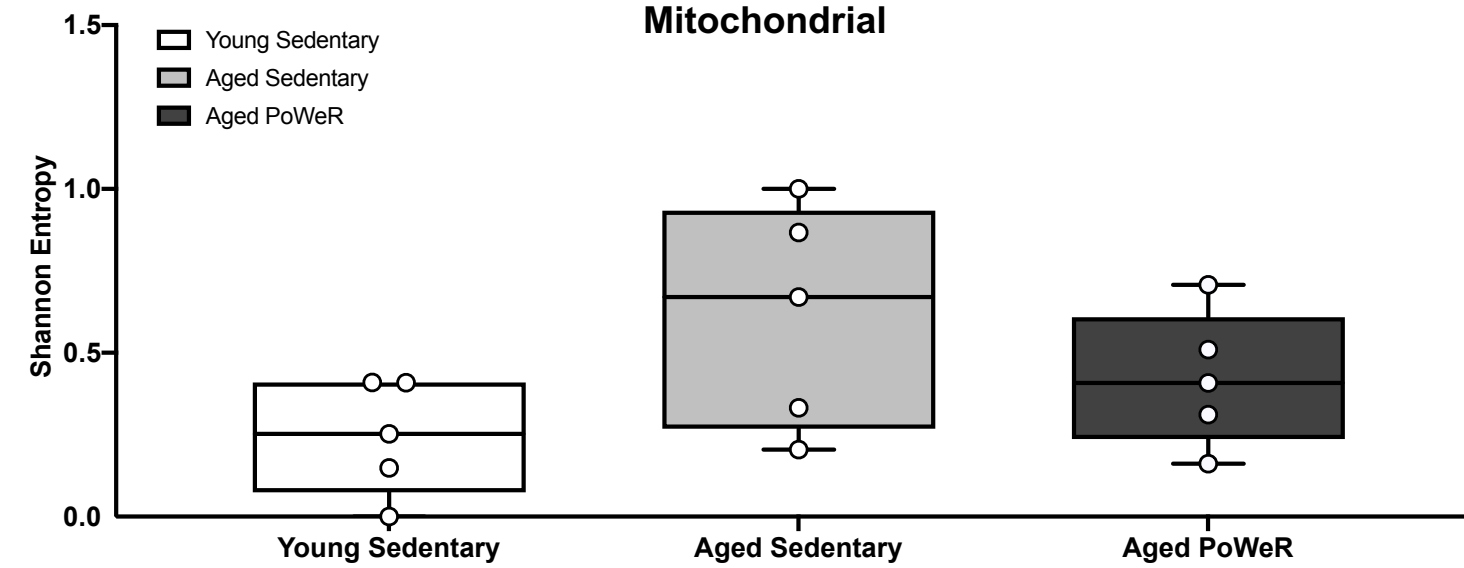

Supplement: ACEL-21-e13527-s015.pdf [file ACEL-21-e13527-s015.pdf]
